# Supplementary material for: Imputation Performance in Latin American Populations: Improving Rare Variants Representation With the Inclusion of Native American Genomes
Source: Front Genet. 2022 Jan 3;12:719791. doi: 10.3389/fgene.2021.719791 (PMC8762266; doi:10.3389/fgene.2021.719791)
Supplement: Supplementary file 2 [file DataSheet2.xlsx]

## Sheet: Supp_table1
Source	Sample_ID	Country	Ethnicity	African_ancestry	European_ancestry	Native_ancestry
HGDP	HGDP00702_HGDP00702	Colombia	Colombian	0	0	100
HGDP	HGDP00703_HGDP00703	Colombia	Colombian	3	4	93
HGDP	HGDP00704_HGDP00704	Colombia	Colombian	0	0	100
HGDP	HGDP00706_HGDP00706	Colombia	Colombian	0	0	100
HGDP	HGDP00708_HGDP00708	Colombia	Colombian	0	0	100
HGDP	HGDP00710_HGDP00710	Colombia	Colombian	0	0	100
HGDP	HGDP00832_HGDP00832	Brazil	Surui	0	0	100
HGDP	HGDP00837_HGDP00837	Brazil	Surui	0	0	100
HGDP	HGDP00838_HGDP00838	Brazil	Surui	0	0	100
HGDP	HGDP00843_HGDP00843	Brazil	Surui	0	0	100
HGDP	HGDP00845_HGDP00845	Brazil	Surui	0	0	100
HGDP	HGDP00846_HGDP00846	Brazil	Surui	0	0	100
HGDP	HGDP00849_HGDP00849	Brazil	Surui	0	0	100
HGDP	HGDP00852_HGDP00852	Brazil	Surui	0	0	100
HGDP	HGDP00854_HGDP00854	Mexico	Maya	0	3	97
HGDP	HGDP00855_HGDP00855	Mexico	Maya	0	0	100
HGDP	HGDP00856_HGDP00856	Mexico	Maya	0	0	100
HGDP	HGDP00857_HGDP00857	Mexico	Maya	0	0	100
HGDP	HGDP00858_HGDP00858	Mexico	Maya	0	1	99
HGDP	HGDP00859_HGDP00859	Mexico	Maya	0	0	100
HGDP	HGDP00860_HGDP00860	Mexico	Maya	2	23	75
HGDP	HGDP00861_HGDP00861	Mexico	Maya	2	11	87
HGDP	HGDP00862_HGDP00862	Mexico	Maya	0	5	95
HGDP	HGDP00863_HGDP00863	Mexico	Maya	3	0	97
HGDP	HGDP00864_HGDP00864	Mexico	Maya	0	0	100
HGDP	HGDP00865_HGDP00865	Mexico	Maya	0	0	100
HGDP	HGDP00868_HGDP00868	Mexico	Maya	1	7	91
HGDP	HGDP00869_HGDP00869	Mexico	Maya	0	13	87
HGDP	HGDP00870_HGDP00870	Mexico	Maya	0	1	99
HGDP	HGDP00871_HGDP00871	Mexico	Maya	0	22	78
HGDP	HGDP00872_HGDP00872	Mexico	Maya	0	0	100
HGDP	HGDP00873_HGDP00873	Mexico	Maya	0	0	100
HGDP	HGDP00875_HGDP00875	Mexico	Maya	2	3	95
HGDP	HGDP00876_HGDP00876	Mexico	Maya	0	22	78
HGDP	HGDP00877_HGDP00877	Mexico	Maya	0	7	93
HGDP	HGDP00970_HGDP00970	Colombia	Colombian	0	0	100
HGDP	HGDP00995_HGDP00995	Brazil	Karitiana	0	0	100
HGDP	HGDP00998_HGDP00998	Brazil	Karitiana	0	0	100
HGDP	HGDP00999_HGDP00999	Brazil	Karitiana	0	0	100
HGDP	HGDP01001_HGDP01001	Brazil	Karitiana	0	0	100
HGDP	HGDP01009_HGDP01009	Brazil	Karitiana	0	0	100
HGDP	HGDP01010_HGDP01010	Brazil	Karitiana	0	0	100
HGDP	HGDP01012_HGDP01012	Brazil	Karitiana	0	0	100
HGDP	HGDP01013_HGDP01013	Brazil	Karitiana	0	0	100
HGDP	HGDP01014_HGDP01014	Brazil	Karitiana	0	0	100
HGDP	HGDP01015_HGDP01015	Brazil	Karitiana	0	0	100
HGDP	HGDP01018_HGDP01018	Brazil	Karitiana	0	0	100
HGDP	HGDP01019_HGDP01019	Brazil	Karitiana	0	0	100
HGDP	HGDP01037_HGDP01037	Mexico	Pima	0	0	100
HGDP	HGDP01041_HGDP01041	Mexico	Pima	0	0	100
HGDP	HGDP01043_HGDP01043	Mexico	Pima	0	0	100
HGDP	HGDP01044_HGDP01044	Mexico	Pima	0	0	100
HGDP	HGDP01047_HGDP01047	Mexico	Pima	0	0	100
HGDP	HGDP01050_HGDP01050	Mexico	Pima	0	0	100
HGDP	HGDP01053_HGDP01053	Mexico	Pima	0	0	100
HGDP	HGDP01055_HGDP01055	Mexico	Pima	0	0	100
HGDP	HGDP01056_HGDP01056	Mexico	Pima	0	0	100
HGDP	HGDP01057_HGDP01057	Mexico	Pima	0	0	100
HGDP	HGDP01058_HGDP01058	Mexico	Pima	0	0	100
HGDP	HGDP01059_HGDP01059	Mexico	Pima	0	0	100
HGDP	HGDP01060_HGDP01060	Mexico	Pima	0	0	100
INMEGEN	GS000033837-ASM_GS000033837-ASM	Mexico	Tepehuan	0	0	100
INMEGEN	GS000033838-ASM_GS000033838-ASM	Mexico	Tepehuan	0	0	100
INMEGEN	GS000033839-ASM_GS000033839-ASM	Mexico	Zapotec	0	0	100
INMEGEN	GS000033840-ASM_GS000033840-ASM	Mexico	Zapotec	0	0	100
INMEGEN	GS000033841-ASM_GS000033841-ASM	Mexico	Maya	0	0	100
INMEGEN	GS000033842-ASM_GS000033842-ASM	Mexico	Maya	0	0	100
INMEGEN	GS000033843-ASM_GS000033843-ASM	Mexico	Nahua	0	0	100
INMEGEN	GS000033844-ASM_GS000033844-ASM	Mexico	Nahua	0	0	100
INMEGEN	GS000033845-ASM_GS000033845-ASM	Mexico	Totonac	0	0	100
INMEGEN	GS000033846-ASM_GS000033846-ASM	Mexico	Totonac	0	0	100
INMEGEN	GS000033847-ASM_GS000033847-ASM	Mexico	Tarahumara	0	0	100
INMEGEN	GS000034176-ASM_GS000034176-ASM	Mexico	Tarahumara	0	0	100
MXB	MXB_10544	Mexico	Nahua	0	0	100
MXB	MXB_10610	Mexico	Tarahumara	0	0	100
MXB	MXB_11339	Mexico	Nahua	0	1	99
MXB	MXB_11619	Mexico	Tarahumara	0	4	96
MXB	MXB_12529	Mexico	Nahua	0	1	99
MXB	MXB_13075	Mexico	Nahua	0	1	99
MXB	MXB_13175	Mexico	Tarahumara	0	6	94
MXB	MXB_15210	Mexico	Maya	0	0	100
MXB	MXB_15727	Mexico	Totonac	0	0	100
MXB	MXB_15887	Mexico	Totonac	0	2	98
MXB	MXB_160	Mexico	Nahua	0	3	97
MXB	MXB_1655	Mexico	Nahua	0	0	100
MXB	MXB_19262	Mexico	Zapotec/Mazatec	0	0	100
MXB	MXB_19369	Mexico	Zapotec/Mazatec	0	0	100
MXB	MXB_20305	Mexico	Maya	0	2	98
MXB	MXB_20306	Mexico	Maya	0	0	100
MXB	MXB_22419	Mexico	Maya	0	0	100
MXB	MXB_22998	Mexico	Zapotec/Mazatec	0	0	100
MXB	MXB_23094	Mexico	Nahua	0	6	94
MXB	MXB_23097	Mexico	Nahua	0	0	100
MXB	MXB_24133	Mexico	Maya	0	2	98
MXB	MXB_24186	Mexico	Maya	0	0	100
MXB	MXB_24586	Mexico	Huichol	0	0	100
MXB	MXB_2641	Mexico	Nahua	0	8	92
MXB	MXB_28337	Mexico	Zapotec/Mazatec	0	0	100
MXB	MXB_28339	Mexico	Zapotec/Mazatec	0	0	100
MXB	MXB_28344	Mexico	Zapotec/Mazatec	0	0	100
MXB	MXB_28452	Mexico	Zapotec/Mazatec	0	0	100
MXB	MXB_28564	Mexico	Zapotec/Mazatec	0	0	100
MXB	MXB_29762	Mexico	Nahua	0	5	95
MXB	MXB_30112	Mexico	Huichol	0	0	100
MXB	MXB_32325	Mexico	Maya	0	0	100
MXB	MXB_33270	Mexico	Nahua	0	4	96
MXB	MXB_35177	Mexico	Nahua	0	0	100
MXB	MXB_35474	Mexico	Tzotzil	0	0	100
MXB	MXB_35488	Mexico	Tzotzil	0	0	100
MXB	MXB_3573	Mexico	Nahua	0	0	100
MXB	MXB_36131	Mexico	Tzotzil	0	0	100
MXB	MXB_37448	Mexico	Zapotec/Mazatec	0	3	97
MXB	MXB_39462	Mexico	Nahua	0	0	100
MXB	MXB_3990	Mexico	Nahua	0	0	100
MXB	MXB_40340	Mexico	Nahua	0	0	100
MXB	MXB_40376	Mexico	Totonac	0	0	100
MXB	MXB_40870	Mexico	Tzotzil	0	0	100
MXB	MXB_42639	Mexico	Nahua	0	0	100
MXB	MXB_42990	Mexico	Totonac	0	0	100
MXB	MXB_42994	Mexico	Totonac	0	0	100
MXB	MXB_5576	Mexico	Nahua	0	0	100
MXB	MXB_9395	Mexico	Totonac	0	0	100
MXB	MXB_9855	Mexico	Zapotec/Mazatec	0	0	100
SGDP	LP6005443-DNA_A12	Mexico	Zapotec	0	0	100
SGDP	LP6005443-DNA_E11	Mexico	Mixe	0	0	100
SGDP	LP6005443-DNA_F11	Mexico	Mixe	0	0	100
SGDP	LP6005443-DNA_G11	Mexico	Mixtec	0	0	100
SGDP	LP6005443-DNA_H11	Mexico	Mixtec	4	7	89
SGDP	LP6005519-DNA_D01	Argentina	Chane	0	0	100
SGDP	LP6005519-DNA_G02	Peru	Quechua	0	0	100
SGDP	LP6005677-DNA_D01	Mexico	Zapotec	0	0	100
SGDP	LP6005677-DNA_E01	Peru	Quechua	0	0	100
SGDP	LP6005677-DNA_F01	Peru	Quechua	0	0	100
SGDP	SS6004479_SS6004479	Mexico	Mixe	0	0	100

## Sheet: Supp_table2
Sample_ID	Country	Sampling location	inferred_genetic_cluster	Avg_seq_depth
MXB_10544	Mexico	Michoacan	Nahua	41.7514
MXB_10610	Mexico	Chihuahua	Tarahumara	40.5048
MXB_11339	Mexico	Colima	Nahua	41.4689
MXB_11619	Mexico	Sonora	Tarahumara	38.9127
MXB_12529	Mexico	Colima	Nahua	45.7633
MXB_13075	Mexico	Sonora	Nahua	43.3739
MXB_13175	Mexico	Sonora	Tarahumara	38.7735
MXB_15210	Mexico	Campeche	Maya	22.0015
MXB_15727	Mexico	Campeche	Totonac	37.9899
MXB_15887	Mexico	Campeche	Totonac	32.2109
MXB_160	Mexico	Aguascalientes	Nahua	44.23
MXB_1655	Mexico	Queretaro	Nahua	41.8238
MXB_19262	Mexico	Guerrero	Zapotec/Mazatec	40.7944
MXB_19369	Mexico	Guerrero	Zapotec/Mazatec	34.52
MXB_20305	Mexico	Yucatan	Maya	25.492
MXB_20306	Mexico	Yucatan	Maya	27.0762
MXB_22419	Mexico	Baja California	Maya	39.3313
MXB_22998	Mexico	Baja California	Zapotec/Mazatec	40.2603
MXB_23094	Mexico	Jalisco	Nahua	39.5685
MXB_23097	Mexico	Jalisco	Nahua	42.4072
MXB_24133	Mexico	Quintana Roo	Maya	39.6699
MXB_24186	Mexico	Quintana Roo	Maya	41.7477
MXB_24586	Mexico	Nayarit	Huichol	40.7909
MXB_2641	Mexico	Guanajuato	Nahua	41.8516
MXB_28337	Mexico	Oaxaca	Zapotec/Mazatec	39.0276
MXB_28339	Mexico	Oaxaca	Zapotec/Mazatec	40.4428
MXB_28344	Mexico	Oaxaca	Zapotec/Mazatec	40.6716
MXB_28452	Mexico	Oaxaca	Zapotec/Mazatec	41.5283
MXB_28564	Mexico	Baja California Sur	Zapotec/Mazatec	41.0529
MXB_29762	Mexico	Nuevo Leon	Nahua	43.0872
MXB_30112	Mexico	Baja California Sur	Huichol	41.8953
MXB_32325	Mexico	Tabasco	Maya	40.2949
MXB_33270	Mexico	Durango	Nahua	45.0673
MXB_35177	Mexico	Tamaulipas	Nahua	43.272
MXB_35474	Mexico	Chiapas	Tzotzil	41.0049
MXB_35488	Mexico	Chiapas	Tzotzil	41.3766
MXB_3573	Mexico	Morelos	Nahua	44.7057
MXB_36131	Mexico	Chiapas	Tzotzil	40.8202
MXB_37448	Mexico	Sinaloa	Zapotec/Mazatec	42.2784
MXB_39462	Mexico	Hidalgo	Nahua	45.1724
MXB_3990	Mexico	Morelos	Nahua	43.4314
MXB_40340	Mexico	Veracruz	Nahua	46.2325
MXB_40376	Mexico	Veracruz	Totonac	41.1544
MXB_40870	Mexico	Mexico city	Tzotzil	39.0943
MXB_42639	Mexico	Hidalgo	Nahua	40.371
MXB_42990	Mexico	Puebla	Totonac	39.9003
MXB_42994	Mexico	Puebla	Totonac	38.7459
MXB_5576	Mexico	San Luis Potosi	Nahua	43.0976
MXB_9395	Mexico	Tlaxcala	Totonac	38.4576
MXB_9855	Mexico	State of Mexico	Zapotec/Mazatec	44.2961

## Sheet: Supp_table3
Panel	Number of SNPs before merging
INMEGEN	7051859
HGDP	54733129
SGDP	8514696
MX Biobank	8972211

## Sheet: Supp_table4
Population	SNPs with INFO > 0.3 and MAF < 0.01 using 1KGP	SNPs with INFO > 0.3 and MAF < 0.01 using 1KGP + NATS	Avarage proportion of Native American ancestry
Peru	159855	159855	0.7
Mexico	157872	157872	0.42
Colombia	156828	156828	0.18
Puerto Rico	156143	156143	0.06
